# Supplementary material
Source: MDPI journal article supplement (https://www.mdpi.com/2410-3888/8/4/180)
Supplement: s1 [file s1]

***Table S1. Intermuscular bone and morphometrical variation by zones in Colossoma macropomum.***

| Zone | n   | Ibones Length (mm) |       |       | Ibones Number |       |       |
|------|-----|--------------------|-------|-------|---------------|-------|-------|
|      |     | mean               | sd    | cv    | mean          | sd    | cv    |
| THS  | 127 | 7.497              | 2.445 | 0.326 | 7.717         | 3.010 | 0.390 |
| THU  | 127 | 7.863              | 2.468 | 0.313 | 6.189         | 2.445 | 0.395 |
| TOA  | 127 | 11.529             | 2.234 | 0.200 | 13.457        | 2.513 | 0.186 |
